# Supplementary material
Source: Springer Nature journal article supplement (https://www.springermedizin.de/resource/supplementary/12888_2013_1370_MOESM2_ESM.pdf/9480038)
Supplement: MOESM2 [file 9480038]

**Additional file 2 - Study plan and measurements**

| <b>Measurement</b>                      | <b>Instrument</b>                                                                          | <b>Baseline</b> | <b>3<br/>month</b> | <b>6<br/>month</b> |
|-----------------------------------------|--------------------------------------------------------------------------------------------|-----------------|--------------------|--------------------|
| <b>HPA axis activity</b>                |                                                                                            |                 |                    |                    |
| – Diurnal cortisol variation            | Salivettes, Ultra performance liquid chromatography – tandem mass spectrometry (UPLC-MSMS) | •               | •                  | •                  |
| – CAR                                   | Salivettes, UPLC-MSMS                                                                      | •               | •                  | •                  |
| – Mean cortisol concentration           | Salivettes, UPLC-MSMS                                                                      | •               | •                  | •                  |
| – Diurnal cortisol secretion covariates | Saliva collection diary                                                                    | •               | •                  | •                  |
| <b>Experience of violence and abuse</b> |                                                                                            |                 |                    |                    |

| <b>Measurement</b>                      | <b>Instrument</b>                                     | <b>Baseline</b> | <b>3<br/>month</b> | <b>6<br/>month</b> |
|-----------------------------------------|-------------------------------------------------------|-----------------|--------------------|--------------------|
| DVA                                     | Composite Abuse Scale (CAS)                           | •               | •                  | •                  |
| Childhood abuse                         | Childhood Trauma Questionnaire (CTQ)                  | •               |                    |                    |
| <b>Mental health</b>                    |                                                       |                 |                    |                    |
| – Anxiety disorders                     | Generalized Anxiety Disorder (GAD-7)                  | •               | •                  | •                  |
| – Depression                            | Patient Health Questionnaire Depression Scale (PHQ-9) | •               | •                  | •                  |
| – Post Traumatic Stress Disorder (PTSD) | PTSD Symptom Scale: Self-Report Version (PSS-SR)      | •               | •                  | •                  |
| – Functional disability and impairment  | Sheehan Disability Scale (SDS)                        | •               | •                  | •                  |

| <b>Measurement</b>                               | <b>Instrument</b>                                               | <b>Baseline</b> | <b>3<br/>month</b> | <b>6<br/>month</b> |
|--------------------------------------------------|-----------------------------------------------------------------|-----------------|--------------------|--------------------|
| – Perception of stress                           | Perceived Stress Scale (PSS-10)                                 | •               | •                  | •                  |
| <b>Physical health</b>                           |                                                                 |                 |                    |                    |
| – Abuse-related injuries and physical conditions | Miller Abuse Physical Symptom Injury Assessment Scale (MAPSAIS) | •               | •                  | •                  |
| – Standing height                                | KaWe tape, Germany                                              | •               |                    |                    |
| – Weight                                         | SECA scales, Germany                                            | •               | •                  | •                  |
| Socio-demographics                               | Socio-demographic questionnaire                                 | •               |                    |                    |
